# Supplementary material for: A series of polyoxometalate-based compounds including infinite Ag belts and circles constructed by two tolyl-1H-tetrazole isomers
Source: Royal Society of Chemistry journal article supplement (doi:10.1039/c5ra07107k), 2015-01-01
Supplement: c5ra07107k1.pdf [file c5ra07107k1.pdf]

Supplementary Material (ESI) for RSC Advances  
This journal is © The Royal Society of Chemistry

## A series of polyoxometalate-based compounds including infinite Ag belts and circles constructed by two tolyl-1H-tetrazole isomers

Ai-xiang Tian,\* Xue Hou, Jun Ying, Yang Yang, Ya-li Ning, Tian-jiao Li, Xiu-li Wang\*

### Figures

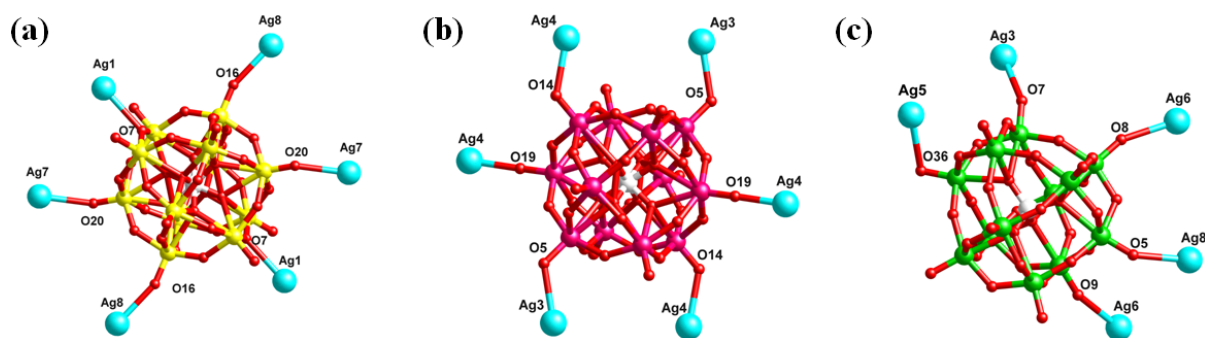

Fig. S1. The coordination modes of  $\text{PMo}_{12}$  in **1** (a),  $\text{PW}_{12}$  anion in **2** (b) and **3** (c).

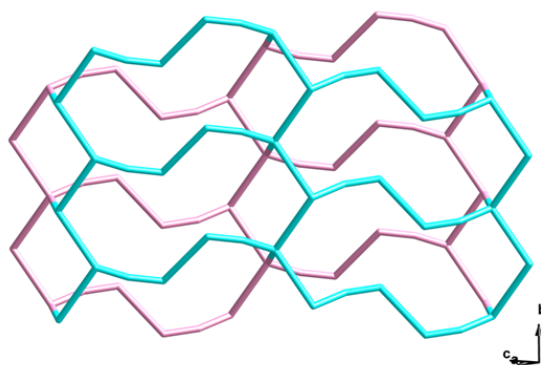

Fig. S2. The 2D network of **3**.

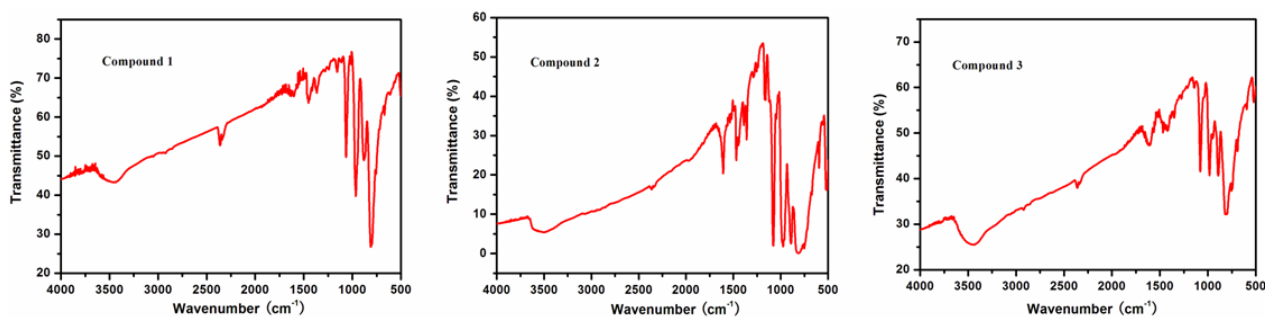

Fig. S3. The IR spectra of compounds **1–3**.

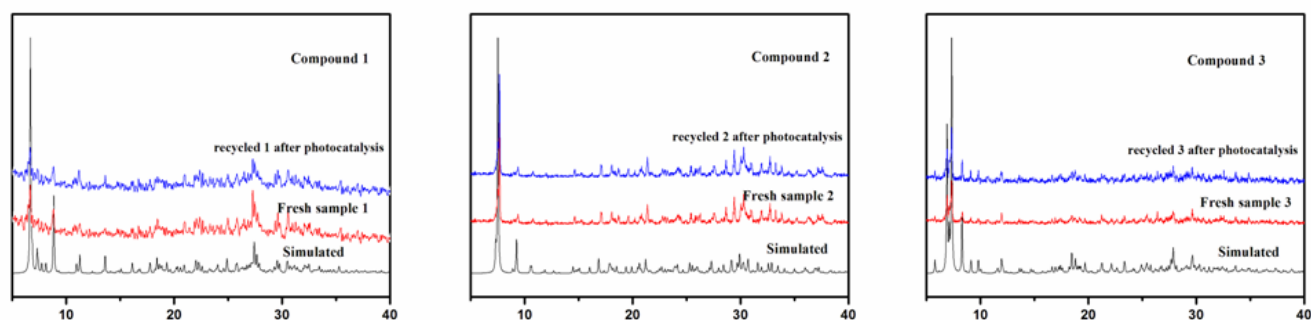

Fig. S4. Powder X-ray diffraction patterns of compounds 1–3.

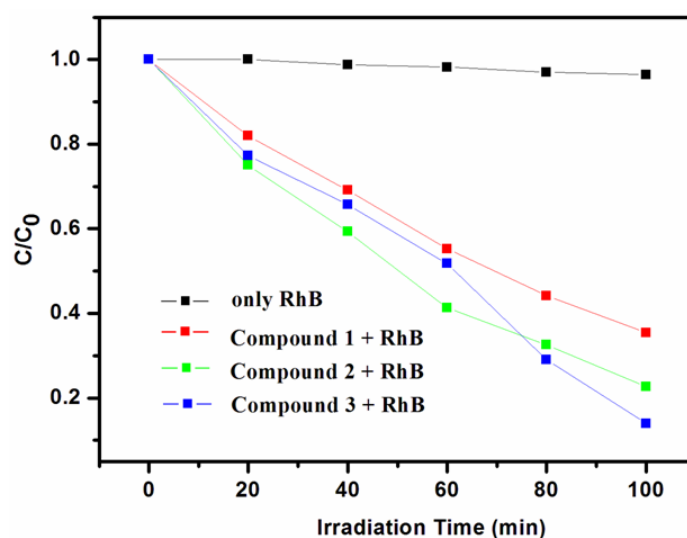

Fig. S5. Photocatalytic decomposition rates of RhB solutions under UV irradiation with the use of the title compounds 1–3 and only RhB.

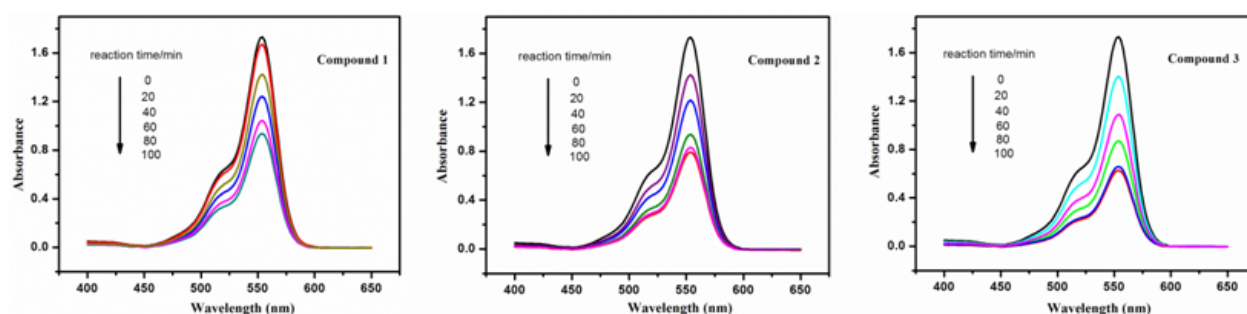

Fig. S6. Absorption spectra of the RhB solution during the decomposition reaction in dark environment with the compounds 1–3 as the catalysts.

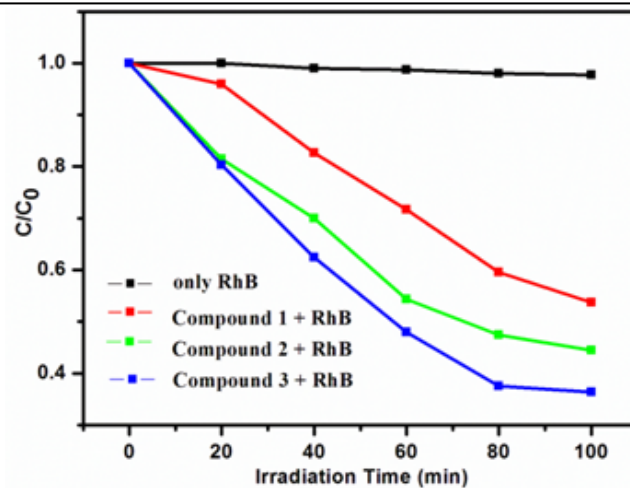

**Fig. S7.** Photocatalytic decomposition rate of the RhB solution in dark environment with the use of the compounds 1–3 and only RhB.

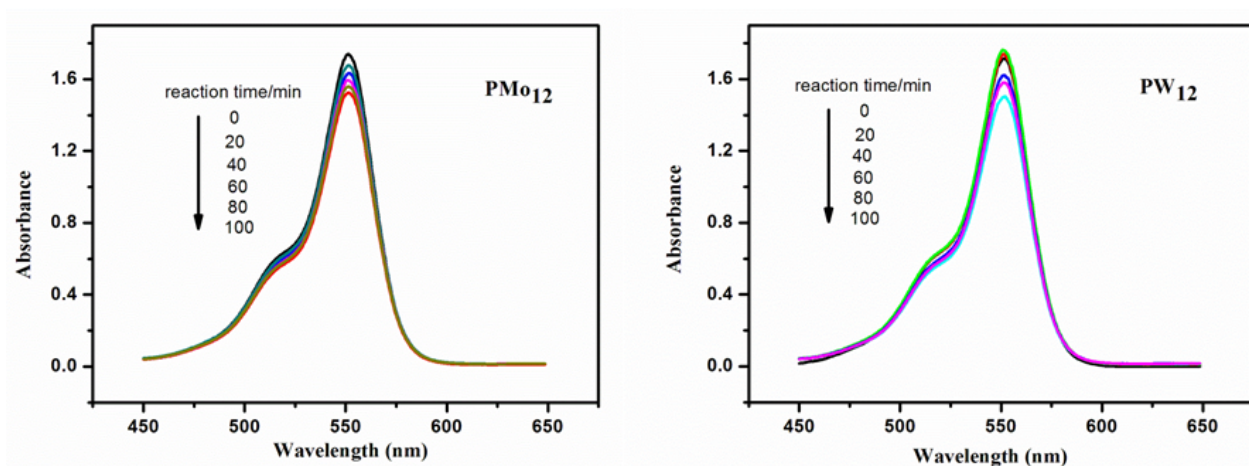

**Fig. S8.** Absorption spectra of the RhB solution during the decomposition reaction under UV irradiation with the presence of parent POMs PMo<sub>12</sub> and PW<sub>12</sub>.

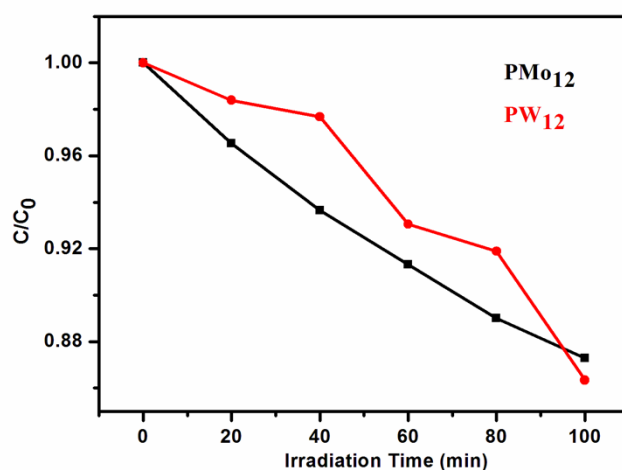

Fig. S9. Photocatalytic decomposition rates of RhB solutions under UV irradiation with the use of parent POMs  $PMo_{12}$  and  $PW_{12}$ .

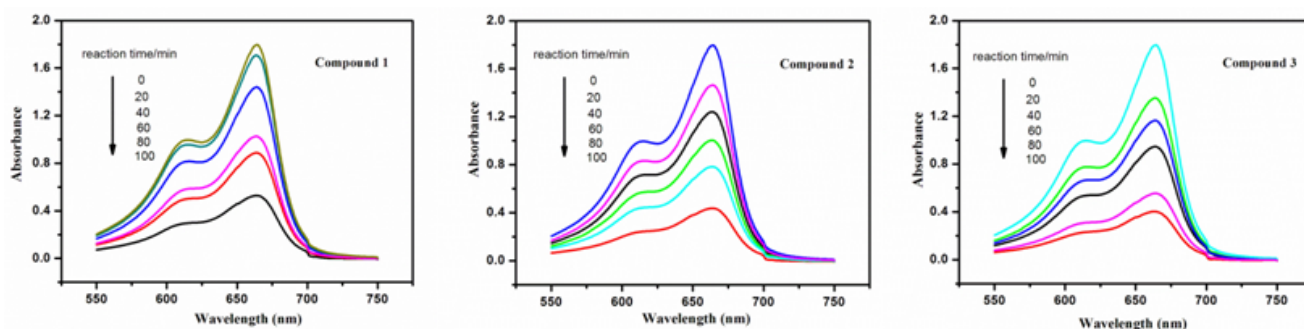

Fig. S10. Absorption spectra of the MB solution during the decomposition reaction under UV irradiation with the presence of compounds 1–3.

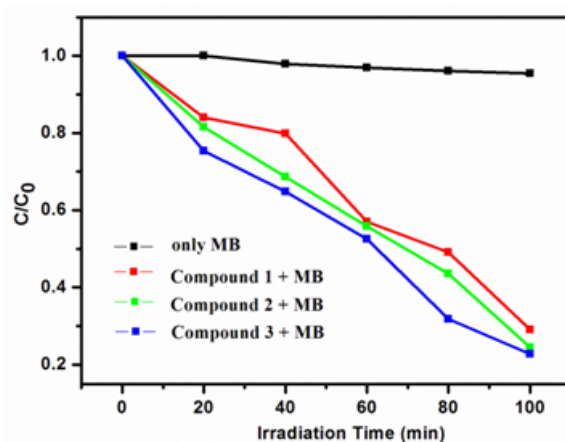

Fig. S11. Photocatalytic decomposition rates of MB solutions under UV irradiation with the use of the title compounds 1–3 and only MB.

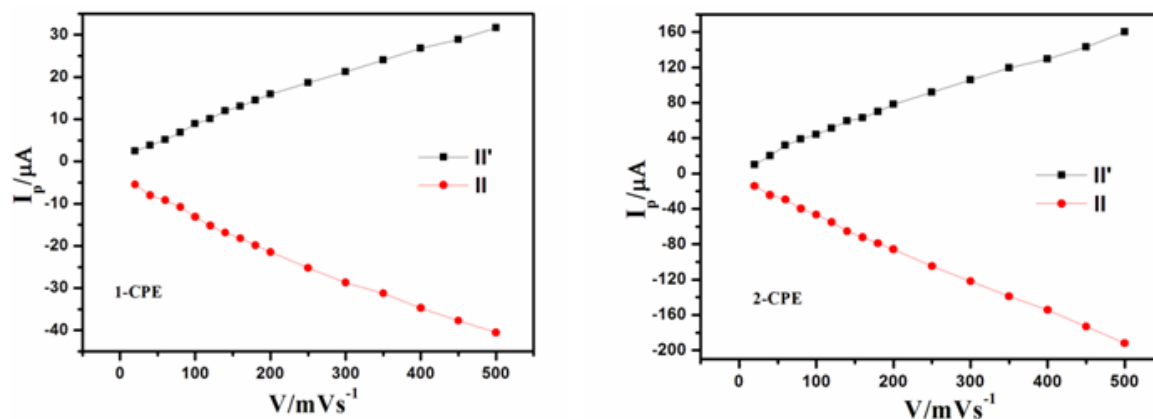

Fig. S12. The dependence of anodic peak (II) and cathodic peak (II') currents of 1- and 2-CPEs on scan rates.

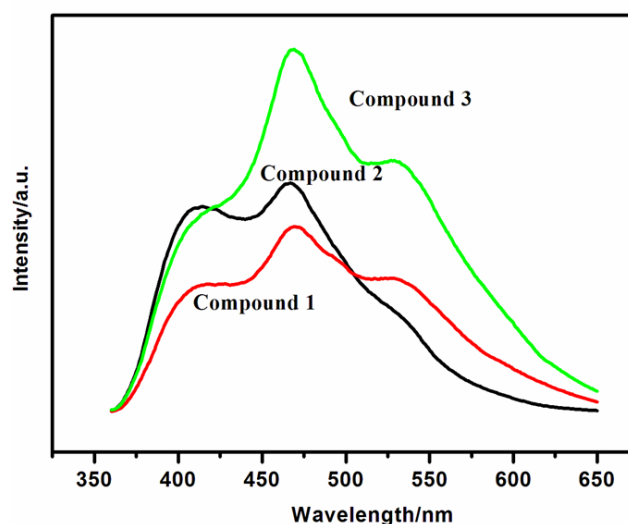

Fig. S13. Fluorescent properties of 1–3 in the solid state at room temperature.

Table. S1. Selected bond distances (Å) and angles (°) for compounds 1–3.

| Compound 1    |           |               |           |
|---------------|-----------|---------------|-----------|
| O(40)-Ag(1)   | 2.550(17) | Ag(1)-N(6)    | 2.160(19) |
| Ag(1)-C(21)#3 | 2.43(3)   | Ag(1)-C(20)#3 | 2.47(2)   |
| Ag(2)-N(4)#4  | 2.200(18) | Ag(2)-N(17)   | 2.231(18) |
| Ag(2)-N(3)#5  | 2.433(18) | Ag(3)-N(20)   | 2.17(2)   |
| Ag(3)-N(5)    | 2.220(18) | Ag(3)-N(11)   | 2.394(19) |
| Ag(4)-N(19)   | 2.28(2)   | Ag(4)-N(15)   | 2.339(18) |
| Ag(4)-N(10)   | 2.358(18) | Ag(4)-C(12)   | 2.54(2)   |
| Ag(5)-N(12)   | 2.077(17) | Ag(5)-N(12)#3 | 2.077(17) |
| Ag(6)-N(16)   | 2.21(2)   | Ag(6)-N(2)#5  | 2.22(2)   |
| Ag(6)-N(18)   | 2.366(19) | Ag(7)-N(8)    | 2.238(19) |

**Supplementary Material (ESI) for RSC Advances**  
**This journal is © The Royal Society of Chemistry**

|                       |           |                       |            |
|-----------------------|-----------|-----------------------|------------|
| Ag(7)-N(1)            | 2.31(2)   | Ag(7)-C(28)#6         | 2.54(2)    |
| Ag(8)-N(9)            | 2.225(18) | Ag(8)-N(14)           | 2.268(17)  |
| Ag(8)-N(13)#7         | 2.296(17) | Ag(8)-Ag(8)#7         | 3.355(4)   |
| C(20)-Ag(1)#3         | 2.47(2)   | C(21)-Ag(1)#3         | 2.43(3)    |
| C(28)-Ag(7)#5         | 2.54(2)   | N(2)-Ag(6)#6          | 2.22(2)    |
| N(3)-Ag(2)#6          | 2.433(18) | N(4)-Ag(2)#4          | 2.200(18)  |
| N(13)-Ag(8)#7         | 2.296(17) | N(6)-Ag(1)-C(21)#3    | 150.1(8)   |
| N(6)-Ag(1)-C(20)#3    | 167.5(8)  | C(21)#3-Ag(1)-C(20)#3 | 33.8(8)    |
| N(6)-Ag(1)-O(40)      | 85.8(6)   | C(21)#3-Ag(1)-O(40)   | 89.0(7)    |
| C(20)#3-Ag(1)-O(40)   | 106.7(7)  | N(6)-Ag(1)-K(1)       | 53.7(5)    |
| C(21)#3-Ag(1)-K(1)    | 143.8(6)  | C(20)#3-Ag(1)-K(1)    | 132.7(7)   |
| O(40)-Ag(1)-K(1)      | 60.7(4)   | N(4)#4-Ag(2)-N(17)    | 141.4(7)   |
| N(4)#4-Ag(2)-N(3)#5   | 115.4(6)  | N(17)-Ag(2)-N(3)#5    | 102.8(6)   |
| N(20)-Ag(3)-N(5)      | 130.5(7)  | N(20)-Ag(3)-N(11)     | 115.9(7)   |
| N(5)-Ag(3)-N(11)      | 102.3(7)  | N(19)-Ag(4)-N(15)     | 101.0(6)   |
| N(19)-Ag(4)-N(10)     | 112.4(7)  | N(15)-Ag(4)-N(10)     | 110.5(7)   |
| N(19)-Ag(4)-C(12)     | 106.6(8)  | N(15)-Ag(4)-C(12)     | 123.4(7)   |
| N(10)-Ag(4)-C(12)     | 103.0(8)  | N(12)-Ag(5)-N(12)#3   | 179.998(2) |
| N(16)-Ag(6)-N(2)#5    | 143.1(7)  | N(16)-Ag(6)-N(18)     | 112.5(7)   |
| N(2)#5-Ag(6)-N(18)    | 100.9(7)  | N(8)-Ag(7)-N(1)       | 114.4(7)   |
| N(8)-Ag(7)-C(28)#6    | 135.9(7)  | N(1)-Ag(7)-C(28)#6    | 106.9(7)   |
| N(8)-Ag(7)-K(1)       | 58.2(5)   | N(1)-Ag(7)-K(1)       | 62.0(5)    |
| C(28)#6-Ag(7)-K(1)    | 165.3(5)  | N(9)-Ag(8)-N(14)      | 115.4(6)   |
| N(9)-Ag(8)-N(13)#7    | 117.1(6)  | N(14)-Ag(8)-N(13)#7   | 127.2(6)   |
| N(9)-Ag(8)-Ag(8)#7    | 167.0(4)  | N(14)-Ag(8)-Ag(8)#7   | 60.0(4)    |
| N(13)#7-Ag(8)-Ag(8)#7 | 67.5(4)   | N(7)-K(1)-Ag(1)       | 58.5(5)    |
| O(1W)-K(1)-Ag(1)      | 135.6(10) | O(8)-K(1)-Ag(1)       | 78.9(4)    |
| O(11)-K(1)-Ag(1)      | 49.6(4)   | O(23)#2-K(1)-Ag(1)    | 83.2(5)    |
| N(6)-K(1)-Ag(1)       | 35.2(4)   | C(3)-K(1)-Ag(1)       | 99.5(6)    |
| N(8)-K(1)-Ag(1)       | 75.3(3)   | O(40)-K(1)-Ag(1)      | 41.7(3)    |
| C(1)-K(1)-Ag(1)       | 139.7(5)  | Mo(4)-K(1)-Ag(1)      | 59.20(10)  |
| C(11)-C(12)-Ag(4)     | 96.1(16)  | C(13)-C(12)-Ag(4)     | 94.4(16)   |
| Ag(4)-C(12)-H(12A)    | 114.4     | C(19)-C(20)-Ag(1)#3   | 109.7(17)  |
| C(21)-C(20)-Ag(1)#3   | 71.7(15)  | Ag(1)#3-C(20)-H(20A)  | 88.7       |
| C(22)-C(21)-Ag(1)#3   | 104.8(17) | C(20)-C(21)-Ag(1)#3   | 74.5(15)   |
| Ag(1)#3-C(21)-H(21A)  | 90.7      | C(27)-C(28)-Ag(7)#5   | 84.7(13)   |
| C(29)-C(28)-Ag(7)#5   | 90.8(16)  | Ag(7)#5-C(28)-H(28A)  | 94.5       |
| N(2)-N(1)-Ag(7)       | 127.5(16) | C(1)-N(1)-Ag(7)       | 123.3(17)  |
| N(3)-N(2)-Ag(6)#6     | 127.7(15) | N(1)-N(2)-Ag(6)#6     | 123.6(16)  |
| N(2)-N(3)-Ag(2)#6     | 126.4(15) | N(4)-N(3)-Ag(2)#6     | 120.1(14)  |
| C(1)-N(4)-Ag(2)#4     | 134.9(16) | N(3)-N(4)-Ag(2)#4     | 119.3(13)  |
| N(6)-N(5)-Ag(3)       | 129.1(14) | C(9)-N(5)-Ag(3)       | 123.3(15)  |
| N(5)-N(6)-Ag(1)       | 122.2(14) | N(7)-N(6)-Ag(1)       | 130.4(13)  |
| C(9)-N(8)-Ag(7)       | 139.6(16) | N(7)-N(8)-Ag(7)       | 114.3(13)  |

**Supplementary Material (ESI) for RSC Advances**  
**This journal is © The Royal Society of Chemistry**

|                     |           |                       |            |
|---------------------|-----------|-----------------------|------------|
| C(17)-N(9)-Ag(8)    | 134.4(15) | N(10)-N(9)-Ag(8)      | 117.8(13)  |
| N(11)-N(10)-Ag(4)   | 122.9(14) | N(9)-N(10)-Ag(4)      | 122.5(13)  |
| N(10)-N(11)-Ag(3)   | 110.5(13) | N(12)-N(11)-Ag(3)     | 141.2(13)  |
| C(17)-N(12)-Ag(5)   | 126.5(15) | N(11)-N(12)-Ag(5)     | 125.0(14)  |
| N(14)-N(13)-Ag(8)#7 | 105.2(12) | C(25)-N(13)-Ag(8)#7   | 148.8(14)  |
| N(15)-N(14)-Ag(8)   | 125.9(14) | N(13)-N(14)-Ag(8)     | 125.6(12)  |
| N(14)-N(15)-Ag(4)   | 114.2(14) | N(16)-N(15)-Ag(4)     | 131.7(16)  |
| N(15)-N(16)-Ag(6)   | 117.9(15) | C(25)-N(16)-Ag(6)     | 136.2(16)  |
| C(33)-N(17)-Ag(2)   | 132.3(15) | N(18)-N(17)-Ag(2)     | 116.7(14)  |
| N(19)-N(18)-Ag(6)   | 117.8(14) | N(17)-N(18)-Ag(6)     | 131.0(15)  |
| N(18)-N(19)-Ag(4)   | 129.9(15) | N(20)-N(19)-Ag(4)     | 120.8(14)  |
| C(33)-N(20)-Ag(3)   | 136.5(16) | N(19)-N(20)-Ag(3)     | 116.3(14)  |
| O(40)-Ag(1)         | 2.550(17) | Ag(1)-N(6)            | 2.160(19)  |
| Ag(1)-C(21)#3       | 2.43(3)   | Ag(1)-C(20)#3         | 2.47(2)    |
| Ag(2)-N(4)#4        | 2.200(18) | Ag(2)-N(17)           | 2.231(18)  |
| Ag(2)-N(3)#5        | 2.433(18) | Ag(3)-N(20)           | 2.17(2)    |
| Ag(3)-N(5)          | 2.220(18) | Ag(3)-N(11)           | 2.394(19)  |
| Ag(4)-N(19)         | 2.28(2)   | Ag(4)-N(15)           | 2.339(18)  |
| Ag(4)-N(10)         | 2.358(18) | Ag(4)-C(12)           | 2.54(2)    |
| Ag(5)-N(12)         | 2.077(17) | Ag(5)-N(12)#3         | 2.077(17)  |
| Ag(6)-N(16)         | 2.21(2)   | Ag(6)-N(2)#5          | 2.22(2)    |
| Ag(6)-N(18)         | 2.366(19) | Ag(7)-N(8)            | 2.238(19)  |
| Ag(7)-N(1)          | 2.31(2)   | Ag(7)-C(28)#6         | 2.54(2)    |
| Ag(8)-N(9)          | 2.225(18) | Ag(8)-N(14)           | 2.268(17)  |
| Ag(8)-N(13)#7       | 2.296(17) | Ag(8)-Ag(8)#7         | 3.355(4)   |
| C(20)-Ag(1)#3       | 2.47(2)   | C(21)-Ag(1)#3         | 2.43(3)    |
| C(28)-Ag(7)#5       | 2.54(2)   | N(2)-Ag(6)#6          | 2.22(2)    |
| N(3)-Ag(2)#6        | 2.433(18) | N(4)-Ag(2)#4          | 2.200(18)  |
| N(13)-Ag(8)#7       | 2.296(17) | N(6)-Ag(1)-C(21)#3    | 150.1(8)   |
| N(6)-Ag(1)-C(20)#3  | 167.5(8)  | C(21)#3-Ag(1)-C(20)#3 | 33.8(8)    |
| N(6)-Ag(1)-O(40)    | 85.8(6)   | C(21)#3-Ag(1)-O(40)   | 89.0(7)    |
| C(20)#3-Ag(1)-O(40) | 106.7(7)  | N(6)-Ag(1)-K(1)       | 53.7(5)    |
| C(21)#3-Ag(1)-K(1)  | 143.8(6)  | C(20)#3-Ag(1)-K(1)    | 132.7(7)   |
| O(40)-Ag(1)-K(1)    | 60.7(4)   | N(4)#4-Ag(2)-N(17)    | 141.4(7)   |
| N(4)#4-Ag(2)-N(3)#5 | 115.4(6)  | N(17)-Ag(2)-N(3)#5    | 102.8(6)   |
| N(20)-Ag(3)-N(5)    | 130.5(7)  | N(20)-Ag(3)-N(11)     | 115.9(7)   |
| N(5)-Ag(3)-N(11)    | 102.3(7)  | N(19)-Ag(4)-N(15)     | 101.0(6)   |
| N(19)-Ag(4)-N(10)   | 112.4(7)  | N(15)-Ag(4)-N(10)     | 110.5(7)   |
| N(19)-Ag(4)-C(12)   | 106.6(8)  | N(15)-Ag(4)-C(12)     | 123.4(7)   |
| N(10)-Ag(4)-C(12)   | 103.0(8)  | N(12)-Ag(5)-N(12)#3   | 179.998(2) |
| N(16)-Ag(6)-N(2)#5  | 143.1(7)  | N(16)-Ag(6)-N(18)     | 112.5(7)   |
| N(2)#5-Ag(6)-N(18)  | 100.9(7)  | N(8)-Ag(7)-N(1)       | 114.4(7)   |
| N(8)-Ag(7)-C(28)#6  | 135.9(7)  | N(1)-Ag(7)-C(28)#6    | 106.9(7)   |
| N(8)-Ag(7)-K(1)     | 58.2(5)   | N(1)-Ag(7)-K(1)       | 62.0(5)    |

**Supplementary Material (ESI) for RSC Advances**  
**This journal is © The Royal Society of Chemistry**

|                       |           |                      |           |
|-----------------------|-----------|----------------------|-----------|
| C(28)#6-Ag(7)-K(1)    | 165.3(5)  | N(9)-Ag(8)-N(14)     | 115.4(6)  |
| N(9)-Ag(8)-N(13)#7    | 117.1(6)  | N(14)-Ag(8)-N(13)#7  | 127.2(6)  |
| N(9)-Ag(8)-Ag(8)#7    | 167.0(4)  | N(14)-Ag(8)-Ag(8)#7  | 60.0(4)   |
| N(13)#7-Ag(8)-Ag(8)#7 | 67.5(4)   | N(7)-K(1)-Ag(1)      | 58.5(5)   |
| O(1W)-K(1)-Ag(1)      | 135.6(10) | O(8)-K(1)-Ag(1)      | 78.9(4)   |
| O(11)-K(1)-Ag(1)      | 49.6(4)   | O(23)#2-K(1)-Ag(1)   | 83.2(5)   |
| N(6)-K(1)-Ag(1)       | 35.2(4)   | C(3)-K(1)-Ag(1)      | 99.5(6)   |
| N(8)-K(1)-Ag(1)       | 75.3(3)   | O(40)-K(1)-Ag(1)     | 41.7(3)   |
| C(1)-K(1)-Ag(1)       | 139.7(5)  | Mo(4)-K(1)-Ag(1)     | 59.20(10) |
| C(11)-C(12)-Ag(4)     | 96.1(16)  | C(13)-C(12)-Ag(4)    | 94.4(16)  |
| Ag(4)-C(12)-H(12A)    | 114.4     | C(19)-C(20)-Ag(1)#3  | 109.7(17) |
| C(21)-C(20)-Ag(1)#3   | 71.7(15)  | Ag(1)#3-C(20)-H(20A) | 88.7      |
| C(22)-C(21)-Ag(1)#3   | 104.8(17) | C(20)-C(21)-Ag(1)#3  | 74.5(15)  |
| Ag(1)#3-C(21)-H(21A)  | 90.7      | C(27)-C(28)-Ag(7)#5  | 84.7(13)  |
| C(29)-C(28)-Ag(7)#5   | 90.8(16)  | Ag(7)#5-C(28)-H(28A) | 94.5      |
| N(2)-N(1)-Ag(7)       | 127.5(16) | C(1)-N(1)-Ag(7)      | 123.3(17) |
| N(3)-N(2)-Ag(6)#6     | 127.7(15) | N(1)-N(2)-Ag(6)#6    | 123.6(16) |
| N(2)-N(3)-Ag(2)#6     | 126.4(15) | N(4)-N(3)-Ag(2)#6    | 120.1(14) |
| C(1)-N(4)-Ag(2)#4     | 134.9(16) | N(3)-N(4)-Ag(2)#4    | 119.3(13) |
| N(6)-N(5)-Ag(3)       | 129.1(14) | C(9)-N(5)-Ag(3)      | 123.3(15) |
| N(5)-N(6)-Ag(1)       | 122.2(14) | N(7)-N(6)-Ag(1)      | 130.4(13) |
| C(9)-N(8)-Ag(7)       | 139.6(16) | N(7)-N(8)-Ag(7)      | 114.3(13) |
| C(17)-N(9)-Ag(8)      | 134.4(15) | N(10)-N(9)-Ag(8)     | 117.8(13) |
| N(11)-N(10)-Ag(4)     | 122.9(14) | N(9)-N(10)-Ag(4)     | 122.5(13) |
| N(10)-N(11)-Ag(3)     | 110.5(13) | N(12)-N(11)-Ag(3)    | 141.2(13) |
| C(17)-N(12)-Ag(5)     | 126.5(15) | N(11)-N(12)-Ag(5)    | 125.0(14) |
| N(14)-N(13)-Ag(8)#7   | 105.2(12) | C(25)-N(13)-Ag(8)#7  | 148.8(14) |
| N(15)-N(14)-Ag(8)     | 125.9(14) | N(13)-N(14)-Ag(8)    | 125.6(12) |
| N(14)-N(15)-Ag(4)     | 114.2(14) | N(16)-N(15)-Ag(4)    | 131.7(16) |
| N(15)-N(16)-Ag(6)     | 117.9(15) | C(25)-N(16)-Ag(6)    | 136.2(16) |
| C(33)-N(17)-Ag(2)     | 132.3(15) | N(18)-N(17)-Ag(2)    | 116.7(14) |
| N(19)-N(18)-Ag(6)     | 117.8(14) | N(17)-N(18)-Ag(6)    | 131.0(15) |
| N(18)-N(19)-Ag(4)     | 129.9(15) | N(20)-N(19)-Ag(4)    | 120.8(14) |
| C(33)-N(20)-Ag(3)     | 136.5(16) | N(19)-N(20)-Ag(3)    | 116.3(14) |
| O(40)-Ag(1)           | 2.550(17) | Ag(1)-N(6)           | 2.160(19) |

Symmetry code: #1 -x+3/2, -y+1/2, -z+1 #2 -x+1/2, -y+1/2, -z+1 #3 -x+1, y, -z+3/2

**Compound 2**

|               |            |               |            |
|---------------|------------|---------------|------------|
| O(14)-Ag(4)#2 | 2.591(10)  | O(19)-Ag(4)   | 2.350(10)  |
| Ag(1)-N(6)    | 2.127(10)  | Ag(1)-N(6)#3  | 2.127(10)  |
| Ag(1)-Ag(2)   | 3.2220(14) | Ag(1)-Ag(2)#3 | 3.2221(14) |
| Ag(2)-N(4)    | 2.143(10)  | Ag(2)-N(5)#3  | 2.144(12)  |
| Ag(3)-N(3)    | 2.290(10)  | Ag(3)-N(7)    | 2.320(10)  |
| Ag(3)-N(2)#4  | 2.372(11)  | Ag(4)-N(1)#4  | 2.217(10)  |
| Ag(4)-N(8)    | 2.276(10)  | Ag(4)-O(14)#2 | 2.591(10)  |



**Supplementary Material (ESI) for RSC Advances**  
**This journal is © The Royal Society of Chemistry**

|                      |           |                      |            |
|----------------------|-----------|----------------------|------------|
| N(1)-Ag(4)#4         | 2.217(10) | N(2)-Ag(3)#4         | 2.372(11)  |
| N(5)-Ag(2)#3         | 2.144(12) | W(2)-O(14)-Ag(4)#2   | 126.2(5)   |
| W(4)-O(19)-Ag(4)     | 170.7(6)  | N(6)-Ag(1)-N(6)#3    | 180.000(1) |
| N(6)-Ag(1)-Ag(2)     | 115.9(3)  | N(6)#3-Ag(1)-Ag(2)   | 64.1(3)    |
| N(6)-Ag(1)-Ag(2)#3   | 64.1(3)   | N(6)#3-Ag(1)-Ag(2)#3 | 115.9(3)   |
| Ag(2)-Ag(1)-Ag(2)#3  | 180.0     | N(4)-Ag(2)-N(5)#3    | 169.1(5)   |
| N(4)-Ag(2)-Ag(1)     | 119.8(3)  | N(5)#3-Ag(2)-Ag(1)   | 65.3(3)    |
| N(3)-Ag(3)-N(7)      | 145.8(4)  | N(3)-Ag(3)-N(2)#4    | 102.3(3)   |
| N(7)-Ag(3)-N(2)#4    | 111.9(4)  | N(1)#4-Ag(4)-N(8)    | 113.6(4)   |
| N(1)#4-Ag(4)-O(19)   | 125.5(4)  | N(8)-Ag(4)-O(19)     | 120.8(4)   |
| N(1)#4-Ag(4)-O(14)#2 | 102.9(4)  | N(8)-Ag(4)-O(14)#2   | 80.7(4)    |
| O(19)-Ag(4)-O(14)#2  | 89.4(3)   | C(7)-N(1)-Ag(4)#4    | 127.9(8)   |
| N(2)-N(1)-Ag(4)#4    | 128.0(8)  | N(3)-N(2)-Ag(3)#4    | 130.7(8)   |
| N(1)-N(2)-Ag(3)#4    | 117.6(7)  | N(2)-N(3)-Ag(3)      | 126.7(8)   |
| N(4)-N(3)-Ag(3)      | 124.1(7)  | C(7)-N(4)-Ag(2)      | 120.9(9)   |
| N(3)-N(4)-Ag(2)      | 132.4(7)  | C(15)-N(5)-Ag(2)#3   | 141.3(9)   |
| N(6)-N(5)-Ag(2)#3    | 113.2(8)  | N(7)-N(6)-Ag(1)      | 134.6(8)   |
| N(5)-N(6)-Ag(1)      | 117.3(8)  | N(6)-N(7)-Ag(3)      | 124.5(8)   |
| N(8)-N(7)-Ag(3)      | 123.7(8)  | N(7)-N(8)-Ag(4)      | 122.8(7)   |
| C(15)-N(8)-Ag(4)     | 124.7(8)  |                      |            |

Symmetry code: #1 -x+1/2, -y+3/2, -z+1 #2 -x, y, -z+3/2 #3 -x+1/2, -y+1/2, -z+1

**Compound 3**

|                |           |                |           |
|----------------|-----------|----------------|-----------|
| Ag(1)-N(24)    | 2.201(10) | Ag(1)-N(20)#1  | 2.256(9)  |
| Ag(1)-N(27)#2  | 2.423(10) | Ag(2)-N(21)    | 2.192(11) |
| Ag(2)-N(28)    | 2.215(9)  | Ag(2)-N(19)#3  | 2.598(10) |
| Ag(3)-N(12)    | 2.215(9)  | Ag(3)-N(13)    | 2.236(9)  |
| Ag(3)-N(31)    | 2.496(11) | Ag(4)-N(2)#4   | 2.180(8)  |
| Ag(4)-N(30)    | 2.191(9)  | Ag(4)-N(11)    | 2.271(9)  |
| Ag(5A)-Ag(5C)  | 1.339(4)  | Ag(5A)-Ag(5B)  | 1.460(4)  |
| Ag(5A)-N(18)   | 2.300(11) | Ag(5A)-N(17)#3 | 2.381(9)  |
| Ag(5A)-N(22)#3 | 2.476(10) | Ag(5A)-N(16)#3 | 2.505(10) |
| Ag(5C)-N(22)#3 | 2.240(10) | Ag(5C)-N(17)#3 | 2.266(10) |
| Ag(5C)-Ag(5B)  | 2.774(5)  | Ag(6)-N(8)     | 2.242(8)  |
| Ag(6)-N(1)#4   | 2.270(9)  | Ag(6)-N(10)    | 2.401(9)  |
| Ag(7)-N(4)     | 2.197(10) | Ag(7)-N(9)     | 2.199(9)  |
| Ag(7)-N(7)     | 2.370(9)  | Ag(8)-N(5)#5   | 2.231(9)  |
| Ag(8)-N(3)     | 2.296(8)  | Ag(8)-N(6)     | 2.346(10) |
| Ag(9)-N(25)    | 2.222(10) | Ag(9)-N(32)#6  | 2.242(14) |
| Ag(9)-N(14)#6  | 2.269(11) | Ag(10)-N(15)   | 2.186(10) |
| Ag(10)-N(26)#2 | 2.214(11) | Ag(10)-N(23)   | 2.243(9)  |
| N(1)-Ag(6)#7   | 2.270(9)  | N(2)-Ag(4)#7   | 2.180(8)  |
| N(5)-Ag(8)#5   | 2.231(9)  | N(14)-Ag(9)#2  | 2.269(11) |
| N(16)-Ag(5B)#3 | 2.048(12) | N(16)-Ag(5A)#3 | 2.505(10) |
| N(17)-Ag(5C)#3 | 2.266(10) | N(17)-Ag(5A)#3 | 2.381(9)  |

**Supplementary Material (ESI) for RSC Advances**  
**This journal is © The Royal Society of Chemistry**

|                        |               |                        |           |
|------------------------|---------------|------------------------|-----------|
| N(18)-Ag(5B)           | 2.143(11)     | N(19)-Ag(2)#3          | 2.598(10) |
| N(20)-Ag(1)#8          | 2.256(9)      | N(22)-Ag(5C)#3         | 2.240(10) |
| N(22)-Ag(5A)#3         | 2.476(10)     | N(26)-Ag(10)#6         | 2.214(11) |
| N(27)-Ag(1)#6          | N(27)-Ag(1)#6 | N(32)-Ag(9)#2          | 2.242(14) |
| Ag(5B)-N(16)#3         | 2.048(12)     | N(24)-Ag(1)-N(20)#1    | 149.1(3)  |
| N(24)-Ag(1)-N(27)#2    | 107.9(3)      | N(20)#1-Ag(1)-N(27)#2  | 99.8(4)   |
| N(21)-Ag(2)-N(28)      | 147.8(3)      | N(21)-Ag(2)-N(19)#3    | 98.3(3)   |
| N(28)-Ag(2)-N(19)#3    | 113.6(3)      | N(12)-Ag(3)-N(13)      | 148.7(4)  |
| N(12)-Ag(3)-N(31)      | 96.8(3)       | N(13)-Ag(3)-N(31)      | 114.3(4)  |
| N(2)#4-Ag(4)-N(30)     | 139.1(4)      | N(2)#4-Ag(4)-N(11)     | 116.6(3)  |
| N(30)-Ag(4)-N(11)      | 104.3(3)      | Ag(5C)-Ag(5A)-Ag(5B)   | 164.6(3)  |
| Ag(5C)-Ag(5A)-N(18)    | 99.9(3)       | Ag(5B)-Ag(5A)-N(18)    | 65.1(3)   |
| Ag(5C)-Ag(5A)-N(17)#3  | 68.6(3)       | Ag(5B)-Ag(5A)-N(17)#3  | 113.5(3)  |
| N(18)-Ag(5A)-N(17)#3   | 116.0(3)      | Ag(5C)-Ag(5A)-N(22)#3  | 64.0(3)   |
| Ag(5B)-Ag(5A)-N(22)#3  | 120.5(3)      | N(18)-Ag(5A)-N(22)#3   | 101.0(3)  |
| N(17)#3-Ag(5A)-N(22)#3 | 123.5(4)      | Ag(5C)-Ag(5A)-N(16)#3  | 138.5(3)  |
| Ag(5B)-Ag(5A)-N(16)#3  | 54.8(3)       | N(18)-Ag(5A)-N(16)#3   | 118.8(4)  |
| N(17)#3-Ag(5A)-N(16)#3 | 80.8(3)       | N(22)#3-Ag(5A)-N(16)#3 | 117.5(3)  |
| Ag(5A)-Ag(5C)-N(22)#3  | 83.5(3)       | Ag(5A)-Ag(5C)-N(17)#3  | 78.0(3)   |
| N(22)#3-Ag(5C)-N(17)#3 | 143.5(4)      | Ag(5A)-Ag(5C)-Ag(5B)   | 8.04(14)  |
| N(22)#3-Ag(5C)-Ag(5B)  | 86.4(3)       | N(17)#3-Ag(5C)-Ag(5B)  | 79.7(3)   |
| N(8)-Ag(6)-N(1)#4      | 148.2(3)      | N(8)-Ag(6)-N(10)       | 104.8(3)  |
| N(1)#4-Ag(6)-N(10)     | 107.0(3)      | N(4)-Ag(7)-N(9)        | 140.1(3)  |
| N(4)-Ag(7)-N(7)        | 105.7(3)      | N(9)-Ag(7)-N(7)        | 114.2(3)  |
| N(5)#5-Ag(8)-N(3)      | 141.6(3)      | N(5)#5-Ag(8)-N(6)      | 112.6(3)  |
| N(3)-Ag(8)-N(6)        | 105.3(3)      | N(25)-Ag(9)-N(32)#6    | 126.4(5)  |
| N(25)-Ag(9)-N(14)#6    | 119.1(4)      | N(32)#6-Ag(9)-N(14)#6  | 113.2(5)  |
| N(15)-Ag(10)-N(26)#2   | 121.1(4)      | N(15)-Ag(10)-N(23)     | 128.4(4)  |
| N(26)#2-Ag(10)-N(23)   | 110.1(3)      | C(1)-N(1)-Ag(6)#7      | 129.7(7)  |
| N(2)-N(1)-Ag(6)#7      | 123.6(6)      | N(3)-N(2)-Ag(4)#7      | 122.6(6)  |
| N(1)-N(2)-Ag(4)#7      | 119.3(6)      | N(2)-N(3)-Ag(8)        | 123.1(6)  |
| N(4)-N(3)-Ag(8)        | 127.6(7)      | C(1)-N(4)-Ag(7)        | 128.3(7)  |
| N(3)-N(4)-Ag(7)        | 126.3(7)      | C(9)-N(5)-Ag(8)#5      | 135.1(7)  |
| N(6)-N(5)-Ag(8)#5      | 120.9(7)      | N(7)-N(6)-Ag(8)        | 123.7(7)  |
| N(5)-N(6)-Ag(8)        | 126.2(6)      | N(6)-N(7)-Ag(7)        | 124.9(8)  |
| N(8)-N(7)-Ag(7)        | 121.2(6)      | C(9)-N(8)-Ag(6)        | 136.6(8)  |
| N(7)-N(8)-Ag(6)        | 118.7(6)      | C(17)-N(9)-Ag(7)       | 139.3(8)  |
| N(10)-N(9)-Ag(7)       | 114.3(6)      | N(11)-N(10)-Ag(6)      | 120.1(7)  |
| N(9)-N(10)-Ag(6)       | 129.4(6)      | N(10)-N(11)-Ag(4)      | 114.7(7)  |
| N(12)-N(11)-Ag(4)      | 123.8(7)      | N(11)-N(12)-Ag(3)      | 120.3(7)  |
| C(17)-N(12)-Ag(3)      | 132.0(7)      | C(25)-N(13)-Ag(3)      | 134.0(10) |
| N(14)-N(13)-Ag(3)      | 113.7(8)      | N(15)-N(14)-Ag(9)#2    | 117.3(8)  |
| N(13)-N(14)-Ag(9)#2    | 133.1(8)      | N(14)-N(15)-Ag(10)     | 120.3(9)  |
| N(16)-N(15)-Ag(10)     | 129.3(8)      | N(15)-N(16)-Ag(5B)#3   | 125.5(8)  |

**Supplementary Material (ESI) for RSC Advances**  
**This journal is © The Royal Society of Chemistry**

---

|                         |           |                         |           |
|-------------------------|-----------|-------------------------|-----------|
| C(25)-N(16)-Ag(5B)#3    | 126.9(10) | N(15)-N(16)-Ag(5A)#3    | 105.5(7)  |
| C(25)-N(16)-Ag(5A)#3    | 146.1(9)  | Ag(5B)#3-N(16)-Ag(5A)#3 | 35.7(2)   |
| C(33)-N(17)-Ag(5C)#3    | 135.2(9)  | N(18)-N(17)-Ag(5C)#3    | 119.6(7)  |
| C(33)-N(17)-Ag(5A)#3    | 133.5(8)  | N(18)-N(17)-Ag(5A)#3    | 113.4(7)  |
| Ag(5C)#3-N(17)-Ag(5A)#3 | 33.39(17) | N(19)-N(18)-Ag(5B)      | 122.0(8)  |
| N(17)-N(18)-Ag(5B)      | 115.6(7)  | N(19)-N(18)-Ag(5A)      | 122.8(8)  |
| N(17)-N(18)-Ag(5A)      | 127.6(7)  | Ag(5B)-N(18)-Ag(5A)     | 38.2(2)   |
| N(18)-N(19)-Ag(2)#3     | 129.1(8)  | N(20)-N(19)-Ag(2)#3     | 109.3(7)  |
| C(33)-N(20)-Ag(1)#8     | 134.5(8)  | N(19)-N(20)-Ag(1)#8     | 117.9(7)  |
| C(41)-N(21)-Ag(2)       | 127.0(8)  | N(22)-N(21)-Ag(2)       | 127.3(8)  |
| N(23)-N(22)-Ag(5C)#3    | 116.2(7)  | N(21)-N(22)-Ag(5C)#3    | 129.8(8)  |
| N(21)-N(22)-Ag(5A)#3    | 131.7(8)  | Ag(5C)#3-N(22)-Ag(5A)#3 | 32.51(17) |
| N(22)-N(23)-Ag(10)      | 110.7(7)  | N(24)-N(23)-Ag(10)      | 118.5(7)  |
| C(41)-N(24)-Ag(1)       | 130.8(7)  | N(23)-N(24)-Ag(1)       | 124.6(7)  |
| C(49)-N(25)-Ag(9)       | 138.9(8)  | N(26)-N(25)-Ag(9)       | 115.1(8)  |
| N(27)-N(26)-Ag(10)#6    | 128.1(8)  | N(25)-N(26)-Ag(10)#6    | 117.3(8)  |
| N(28)-N(27)-Ag(1)#6     | 131.0(7)  | N(26)-N(27)-Ag(1)#6     | 118.6(9)  |
| N(27)-N(28)-Ag(2)       | 114.3(7)  | C(49)-N(28)-Ag(2)       | 137.7(8)  |
| N(31)-N(30)-Ag(4)       | 126.6(8)  | N(29)-N(30)-Ag(4)       | 124.0(8)  |
| N(30)-N(31)-Ag(3)       | 128.3(8)  | N(32)-N(31)-Ag(3)       | 121.3(9)  |
| C(57)-N(32)-Ag(9)#2     | 133.5(11) | N(31)-N(32)-Ag(9)#2     | 118.4(11) |
| Ag(5A)-Ag(5B)-N(16)#3   | 89.5(4)   | Ag(5A)-Ag(5B)-N(18)     | 76.7(3)   |
| N(16)#3-Ag(5B)-N(18)    | 161.7(4)  | Ag(5A)-Ag(5B)-Ag(5C)    | 7.37(13)  |
| N(16)#3-Ag(5B)-Ag(5C)   | 96.1(3)   | N(18)-Ag(5B)-Ag(5C)     | 69.6(3)   |

---

Symmetry code: #1 -x, -y+2, -z #2 -x, -y+3, -z

---
